# Supplementary figures and images for: Use of Comparative Transcriptomic Analysis of Different Potato Varieties to Elucidate the Molecular Mechanism Underlying Differences in Cold Resistance
Source: Research Square preprint supplement (doi:10.21203/rs.3.rs-227249/v1), 2021-02-24

**
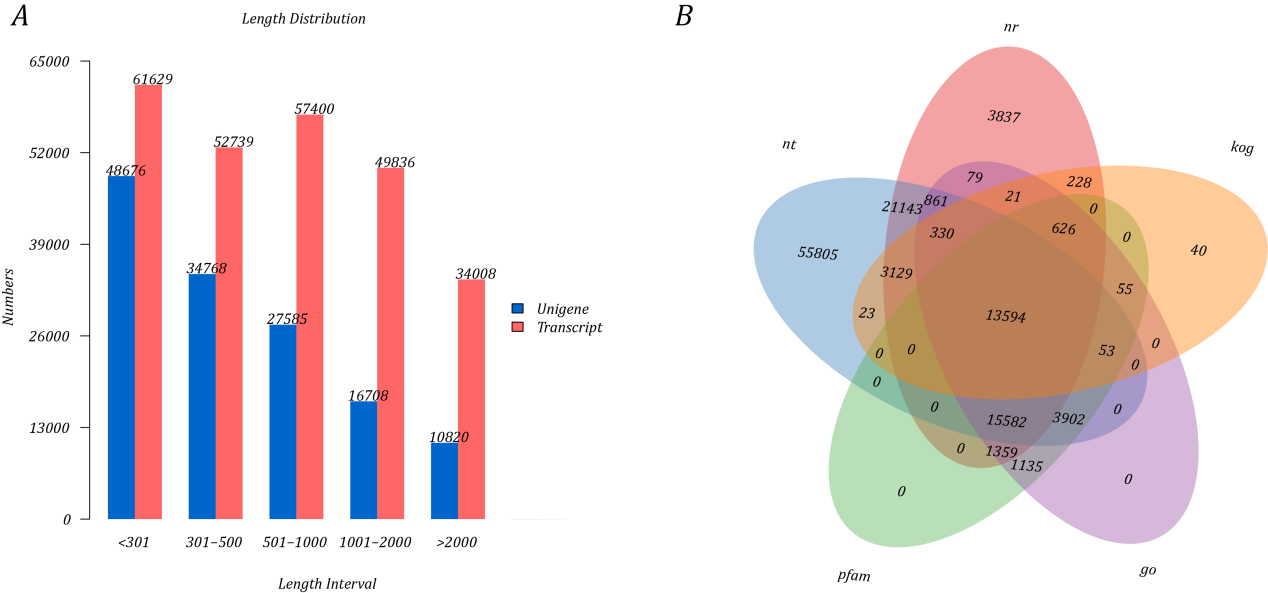
**

**Figure S1** Transcript assembly and the number of annotated genes in the 5 transcript databases

Supplement: Supplementary file 1 [file 385064c1442b49c19edae1ec.docx]
